# Supplementary material
Source: PubMed Central journal article supplement (PMC2717889)
Supplement: en.2009-0050_2.pdf [file en.2009-0050_2.pdf]

**Supplemental Table 1. Taqman assays used for quantitative real time PCR analysis of gene expression (RT-PCR) and chromatin immunoprecipitation (ChIP) assays.**

RT-PCR Taqman assay

m*KLF9* mRNA

Probe – 6FAM-AAAGTCTATGGAAAATCC

Forward primer – 5' GCACAAGTGCCCTACAGT 3'

Reverse primer – 5' TGTATGCACTCTGTAATGGGCTTT 3'

For ChIP assays

m*KLF9* DR-4T<sub>3</sub>RE (-3861 to -3777<sup>#</sup>):

Probe – 6FAM-ACCTCACTTCACCTCTCC-MGB

Forward primer – 5' TCCAGTCCGCAGATAAGAAAATGG 3'

Reverse primer – 5' GGCCTCTTCTGCCTTAAATGAGAT 3'

m*KLF9* proximal promoter (-512 to -441):

Probe – 6FAM-CCAGCCCTCAAACAGT

Forward primer – 5' AGCGTTTGCAGGAAGTCACTTA 3'

Reverse primer – 5' CTAGGGACGAAACAGAACTTCAACT 3'

m*KLF9* proximal intron (with putative IP-4T<sub>3</sub>RE; +5141 to +5196):

Probe – 6FAM-CGTGACCTTGAAAGGTCAT

Forward primer – 5' AGACCTTGGAGGTTG 3'

Reverse primer – 5' CATCCATCATTGTTGTCTG 3'

m*KLF9* medial intron (+11503 to +11569):

Probe – 6FAM-CTTCTGCACTGGTTTTAG

Forward primer – 5' CGTATAGCTGTTTGAGGTCCATAGTT 3'

Reverse primer – 5' CCTGGCCTCGTCTCAGAAATT 3'

m*hr* DR-4T<sub>3</sub>RE (-1929 to -1856)\*

Probe – 6FAM-ATGTCCTCAGATGCC

Forward primer – 5' ACGGCCGCGTGTGT 3'

Reverse primer – 5' TCTGACGTGGGTGCC 3'

---

<sup>#</sup> Positions relative to the transcription start site.

\* Location based on (39) (see Table 3).
