# Supplementary material
Source: PubMed Central journal article supplement (PMC2717889)
Supplement: en.2009-0050_3.pdf [file en.2009-0050_3.pdf]

**Supplemental Table 2. Oligonucleotides used for electrophoretic mobility shift assay (EMSA) and construction of pGL3promoter plasmids.**

**EMSA**

mKLF9 DR-4T<sub>3</sub>RE (-3.8 kb<sup>#</sup>):

top: 5'-gatcAGAGGTGAAGTGAGGTCACAGATCT-3'

bottom: 5'-gatcAGATCTGTGACCTCACTTCACCTCT-3'

mKLF9 mtDR-4T<sub>3</sub>RE (-3.8 kb):

top: 5'-gatcAGAC**CG**TGAAGTGAG**AT**CACAGATCT-3'

bottom: 5'-gatcAGATCTGTGATCTCACTTCACGTCT-3'

rKLF9 DR-4T<sub>3</sub>RE (-3.8 kb):

Upper 5' gatc GCAGG TGGGG CGAGG TCAGC 3'

Bottom 5' gatc GCTGA CCTCG CCCCA CCTGC 3'

hKLF9 DR-4T<sub>3</sub>RE (-2.9 kb):

top: 5' gatc GCAGA TTGTC TGAGG TTAGC 3'

bottom: 5' gatc GCTAA CCTCA GACAA TCTGC 3'

mIntronic IP-4 T<sub>3</sub>RE (+6.2 kb):

top: 5' gatc GCTGA CCTTG AAAGG TCAGC 3'

bottom: 5' gatc GCTGA CCTTT CAAGG TCAGC 3'

xT<sub>3</sub>RE\*

top: 5' gatcGCAGGTCATTCAGGACAGC-3'

bottom: 5'-gatcCGCTGTCCTGAAATGACCTGC-3'

**pGL3promoter**

mKLF9 DR-4T<sub>3</sub>RE (-3.8 kb):

top: 5' CTGGGAGAGGTGAAGTGAGGTCACAGATCTCATTT3'

bottom: 5' catggAAATGAGATCTGTGACCTCACTTCACCTCTCCCAGcgate 3'

mKLF9 mtDR-4T<sub>3</sub>RE (-3.8 kb):

top: 5' CTGGGAGAC**CG**TGAAGTGAG**AT**CACAGATCTCATTT 3'

bottom: 5' catggAAATGAGATCTGTGATCTCACTTCACGTCTCCCAGcgate 3'

---

<sup>#</sup> Positions given are relative to the transcription start sites.

\* From the *X. laevis* TR $\beta$ A gene promoter (42).

Shaded nucleotides represent introduced mutations in each half site of the TRE.

Lower case letters represent non-native additions for [<sup>32</sup>P] labeling by Klenow fill-in (for EMSA) or restriction sites for subcloning into pGL3promoter.

Abbreviations: m – mouse, r – rat, h – human, mt – mutant, inv – inverse, DR-4T<sub>3</sub>RE – direct repeat +4 thyroid hormone response element.
