# Supplementary material
Source: PubMed Central journal article supplement (PMC2717889)

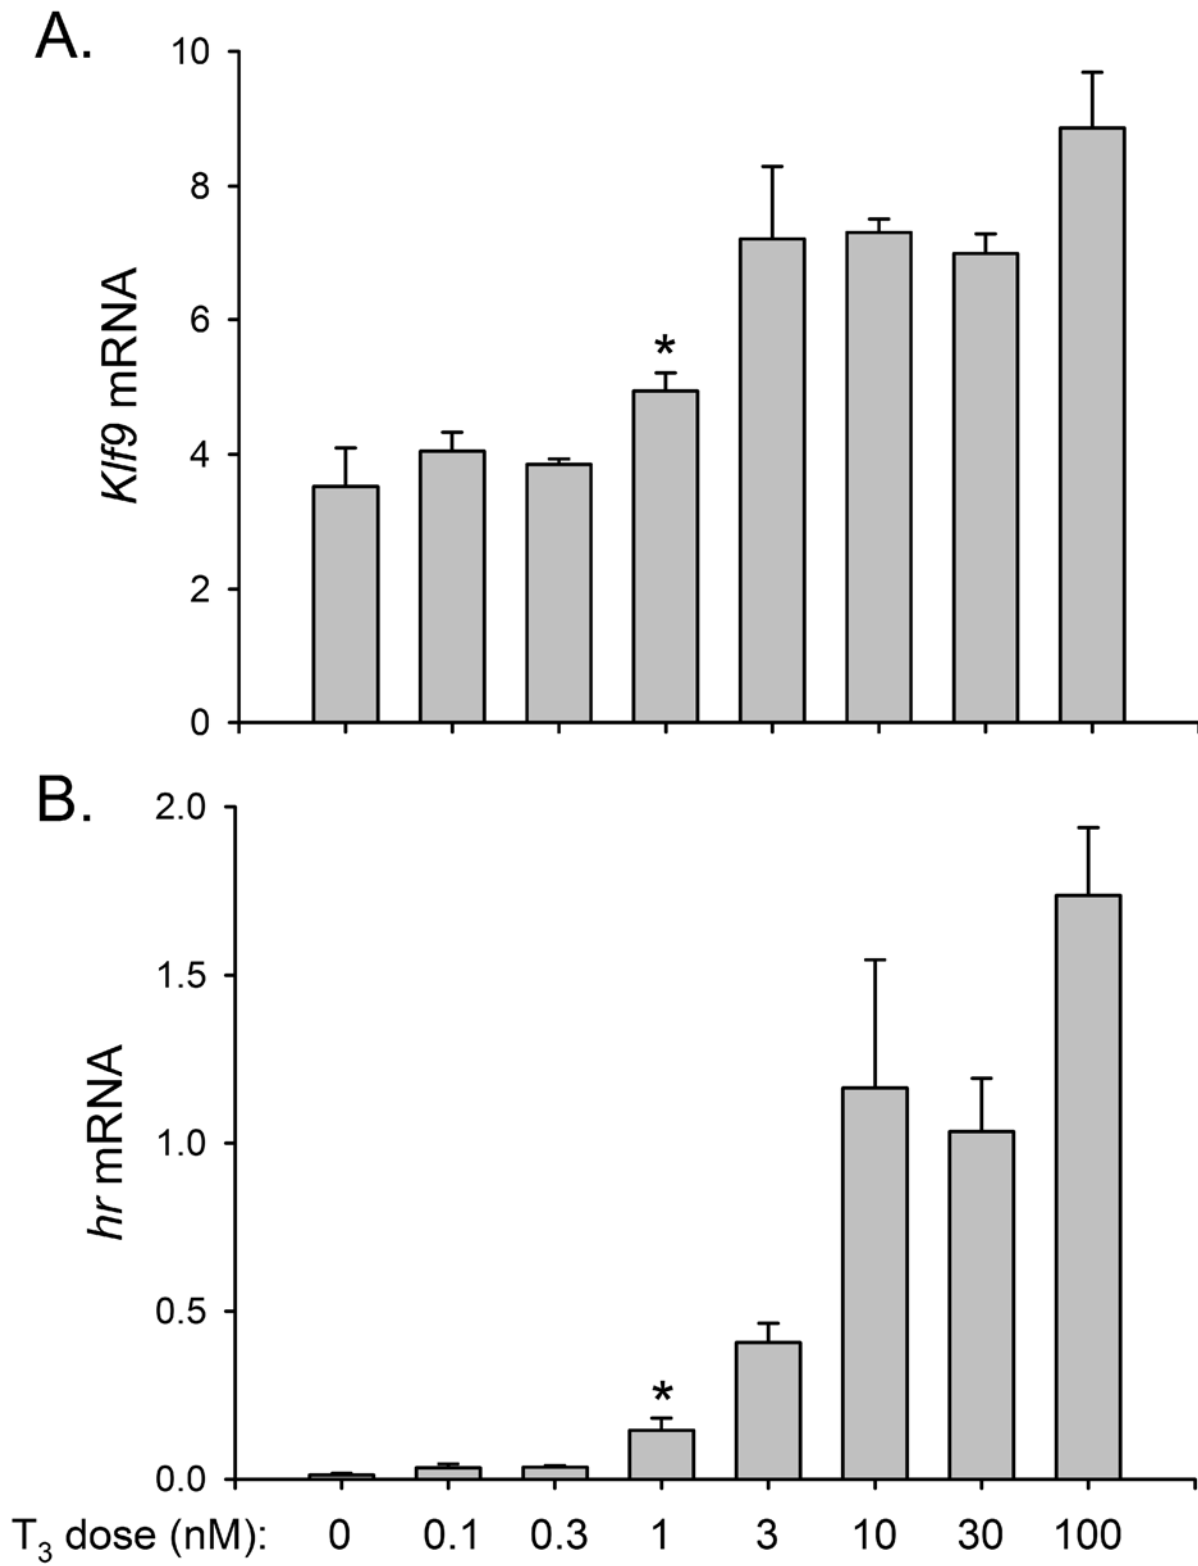

Supplemental Fig. 1

Supplement: en.2009-0050_1.pdf [file en.2009-0050_1.pdf]
